# Supplementary material for: Patients’ Non-Medical and Organizational Needs during Cancer Diagnosis and Treatment
Source: PubMed Central journal article supplement (PMC7459913; doi:10.3390/ijerph17165841), 2020-08-12
Supplement: ijerph-17-05841-s001.pdf [file ijerph-17-05841-s001.pdf]

**Supplementary Materials:**

Table S1 Questionnaire

1. Did cancer diagnosis influence on your professional activity?
  - yes, how?
    - the need to use a long health leave
    - lost a job
    - the need for early retirement
    - other:
  - no
  
2. Did you have any problems with getting social service (financial support, getting pension, orthopedic equipment etc.)?
  - yes
  - no
  - do not need to use
  - do not know about possibility
  
3. Did you have any difficulties during the diagnostic process with access to diagnostic procedures?
  - yes, which?
    - refusal of a referral for examination/visit in specialist
    - long waiting time for diagnostic examinations/visit in specialist
    - long waiting time for getting oncological treatment
    - other:
  - no
  
4. Did you have any inconveniences during the cancer treatment with access to therapeutic procedures?
  - yes, which?
  - no
  
5. Did you get diagnostic and cancer treatment card (possibility of access to quick oncological diagnostics and treatment)?
  - yes
  - no
  - do not know

6. Did you use a private service during diagnostic process?

- yes, why?
- no

7. Could you count on, and have you received, psychological support during the cancer diagnosis and treatment?

- yes, from:
  - partner
  - family
  - friends
  - psychologist
  - priest
  - other:
- no
- do not need to use
- do not know about possibility

8. Could you count on, and have you received, social support during the cancer diagnosis and treatment?

- yes, from:
  - partner
  - family
  - friends
  - dietician
  - physiotherapist
  - social worker
  - other:
- no
- do not need to use
- do not know about possibility

9. Do you think that presence of a professional person in the cancer care system who would help and support cancer patients with the non-medical problems associated with cancer diagnosis and treatment is:

- necessary

- unnecessary
- I have no opinion

## Demographics

**10. Gender:**

- women
- men

**11. Age:**

**12. Education:**

- primary
- secondary
- high

**13. Place of residence**

- city
- village

**14. Professional activity before cancer diagnosis**

- student
- employed
- unemployed
- pensioner

**15. Marital status**

- married
- single
- widow/er
